# Supplementary material
Source: Springer Nature journal article supplement (https://www.springermedizin.de/resource/supplementary/12911_2012_770_MOESM2_ESM.pdf/9526286)
Supplement: MOESM2 [file 9526286]

## a) Target Space with Hotspot

|        |   |     |   |   |   |   |   |   |   |   |    |    |    |    |    |    |    |    |    |    |    |
|--------|---|-----|---|---|---|---|---|---|---|---|----|----|----|----|----|----|----|----|----|----|----|
| Triage | 5 | 0   | 2 | 2 | 2 | 4 | 5 | 4 | 0 | 3 | 2  | 4  | 3  | 6  | 2  | 6  | 6  | 4  | 9  | 3  | 2  |
|        | 4 | 2   | 1 | 0 | 4 | 2 | 0 | 0 | 1 | 2 | 3  | 2  | 8  | 4  | 4  | 3  | 5  | 9  | 4  | 1  | 2  |
|        | 3 | 3   | 1 | 3 | 3 | 1 | 3 | 3 | 1 | 1 | 3  | 3  | 5  | 6  | 8  | 6  | 2  | 5  | 8  | 0  | 2  |
|        | 2 | 6   | 3 | 0 | 3 | 4 | 1 | 2 | 0 | 4 | 0  | 1  | 1  | 3  | 3  | 2  | 0  | 1  | 6  | 4  | 3  |
|        | 1 | 1   | 0 | 0 | 3 | 2 | 1 | 4 | 2 | 2 | 2  | 2  | 3  | 1  | 3  | 3  | 1  | 3  | 1  | 0  | 1  |
|        |   | 1   | 2 | 3 | 4 | 5 | 6 | 7 | 8 | 9 | 10 | 11 | 12 | 13 | 14 | 15 | 16 | 17 | 18 | 19 | 20 |
|        |   | Age |   |   |   |   |   |   |   |   |    |    |    |    |    |    |    |    |    |    |    |

## b) First Generation

|        |   |     |   |   |   |   |   |   |   |   |    |    |    |    |    |    |    |    |    |    |    |
|--------|---|-----|---|---|---|---|---|---|---|---|----|----|----|----|----|----|----|----|----|----|----|
| Triage | 5 | 0   | 2 | 2 | 2 | 4 | 5 | 4 | 0 | 3 | 2  | 4  | 3  | 6  | 2  | 6  | 6  | 4  | 9  | 3  | 2  |
|        | 4 | 2   | 1 | 0 | 4 | 2 | 0 | 0 | 1 | 2 | 3  | 2  | 8  | 4  | 4  | 3  | 5  | 9  | 4  | 1  | 2  |
|        | 3 | 3   | 1 | 3 | 3 | 1 | 3 | 3 | 1 | 1 | 3  | 3  | 5  | 6  | 8  | 6  | 2  | 5  | 8  | 0  | 2  |
|        | 2 | 6   | 3 | 0 | 3 | 4 | 1 | 2 | 0 | 4 | 0  | 1  | 1  | 3  | 3  | 2  | 0  | 1  | 6  | 4  | 3  |
|        | 1 | 1   | 0 | 0 | 3 | 2 | 1 | 4 | 2 | 2 | 2  | 2  | 3  | 1  | 3  | 3  | 1  | 3  | 1  | 0  | 1  |
|        |   | 1   | 2 | 3 | 4 | 5 | 6 | 7 | 8 | 9 | 10 | 11 | 12 | 13 | 14 | 15 | 16 | 17 | 18 | 19 | 20 |
|        |   | Age |   |   |   |   |   |   |   |   |    |    |    |    |    |    |    |    |    |    |    |

## c) Second Generation

|        |   |     |   |   |   |   |   |   |   |   |    |    |    |    |    |    |    |    |    |    |    |
|--------|---|-----|---|---|---|---|---|---|---|---|----|----|----|----|----|----|----|----|----|----|----|
| Triage | 5 | 0   | 2 | 2 | 2 | 4 | 5 | 4 | 0 | 3 | 2  | 4  | 3  | 6  | 2  | 6  | 6  | 4  | 9  | 3  | 2  |
|        | 4 | 2   | 1 | 0 | 4 | 2 | 0 | 0 | 1 | 2 | 3  | 2  | 8  | 4  | 4  | 3  | 5  | 9  | 4  | 1  | 2  |
|        | 3 | 3   | 1 | 3 | 3 | 1 | 3 | 3 | 1 | 1 | 3  | 3  | 5  | 6  | 8  | 6  | 2  | 5  | 8  | 0  | 2  |
|        | 2 | 6   | 3 | 0 | 3 | 4 | 1 | 2 | 0 | 4 | 0  | 1  | 1  | 3  | 3  | 2  | 0  | 1  | 6  | 4  | 3  |
|        | 1 | 1   | 0 | 0 | 3 | 2 | 1 | 4 | 2 | 2 | 2  | 2  | 3  | 1  | 3  | 3  | 1  | 3  | 1  | 0  | 1  |
|        |   | 1   | 2 | 3 | 4 | 5 | 6 | 7 | 8 | 9 | 10 | 11 | 12 | 13 | 14 | 15 | 16 | 17 | 18 | 19 | 20 |
|        |   | Age |   |   |   |   |   |   |   |   |    |    |    |    |    |    |    |    |    |    |    |

## d) Third Generation

|        |   |     |   |   |   |   |   |   |   |   |    |    |    |    |    |    |    |    |    |    |    |
|--------|---|-----|---|---|---|---|---|---|---|---|----|----|----|----|----|----|----|----|----|----|----|
| Triage | 5 | 0   | 2 | 2 | 2 | 4 | 5 | 4 | 0 | 3 | 2  | 4  | 3  | 6  | 2  | 6  | 6  | 4  | 9  | 3  | 2  |
|        | 4 | 2   | 1 | 0 | 4 | 2 | 0 | 0 | 1 | 2 | 3  | 2  | 8  | 4  | 4  | 3  | 5  | 9  | 4  | 1  | 2  |
|        | 3 | 3   | 1 | 3 | 3 | 1 | 3 | 3 | 1 | 1 | 3  | 3  | 5  | 6  | 8  | 6  | 2  | 5  | 8  | 0  | 2  |
|        | 2 | 6   | 3 | 0 | 3 | 4 | 1 | 2 | 0 | 4 | 0  | 1  | 1  | 3  | 3  | 2  | 0  | 1  | 6  | 4  | 3  |
|        | 1 | 1   | 0 | 0 | 3 | 2 | 1 | 4 | 2 | 2 | 2  | 2  | 3  | 1  | 3  | 3  | 1  | 3  | 1  | 0  | 1  |
|        |   | 1   | 2 | 3 | 4 | 5 | 6 | 7 | 8 | 9 | 10 | 11 | 12 | 13 | 14 | 15 | 16 | 17 | 18 | 19 | 20 |
|        |   | Age |   |   |   |   |   |   |   |   |    |    |    |    |    |    |    |    |    |    |    |
